# Supplementary material for: Structure–Activity Relationships of Low Molecular Weight Alginate Oligosaccharide Therapy against Pseudomonas aeruginosa
Source: MDPI journal article supplement (doi:10.3390/biom13091366), 2023-09-08
Supplement: s1 [file s1]

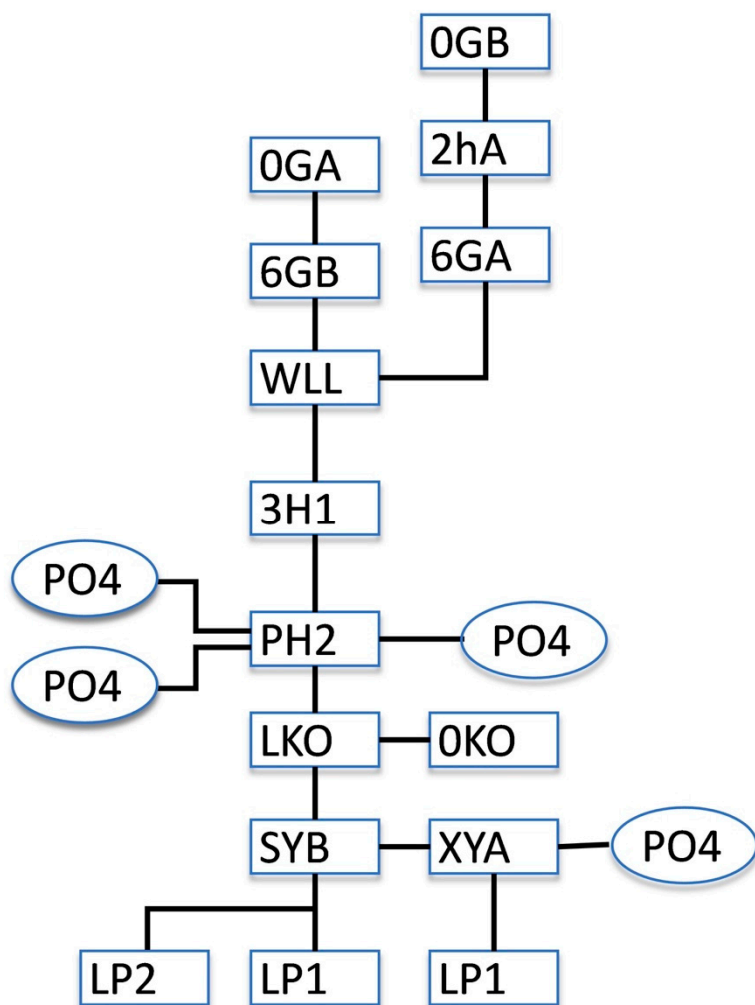

Supplementary Figure S1: schematic representation of potential LPS binding sites during MD simulations

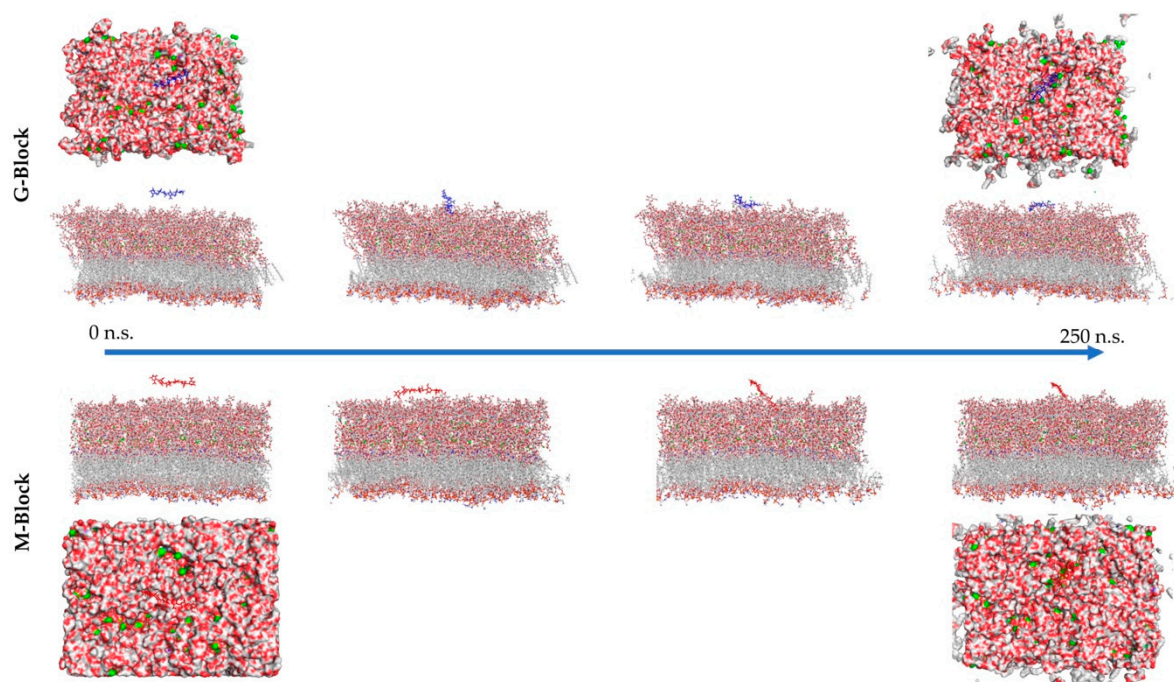

Supplementary Figure S2: representative (side-view) images of the G-block and M-block simulations taken at equal intervals between 0 and 250 ns ( $\text{Ca}^{2+}$  ions are shown in orange), with arial view images at the start and end of the simulation also shown.
